# Supplementary material for: Design and synthesis of an organic (naphthoquinone) and inorganic (RuO2) hybrid graphene hydrogel composite for asymmetric supercapacitors
Source: Royal Society of Chemistry journal article supplement (doi:10.1039/c8nj01908h), 2018-01-01
Supplement: c8nj01908h1.pdf [file c8nj01908h1.pdf]

Electronic Supplementary Information (ESI) for New Journal of Chemistry.

This journal is © The Royal Society of Chemistry and the Centre National de la  
Recherche Scientifique 2018

## Supplementary Information

Design and synthesis of organic (naphthoquinone) and inorganic (RuO<sub>2</sub>)  
hybrid graphene hydrogel composite for asymmetric supercapacitors

Ziyu Zhang,<sup>\*a</sup> Bingshu Guo,<sup>b</sup> Xiaotong Wang,<sup>a</sup> Zhimin Li,<sup>a</sup> Yuying Yang,<sup>a</sup> and

Zhongai Hu<sup>\*a</sup>

<sup>a</sup> *Key Laboratory of Eco-Environment-Related Polymer Materials of Ministry of Education, Key*

*Laboratory of Polymer Materials of Gansu Province, College of Chemistry and Chemical*

*Engineering, Northwest Normal University, Lanzhou, Gansu 730070, PR China*

<sup>b</sup> *Institute for Clean Energy & Advanced Materials, Faculty of Materials and Energy, Southwest*

*University, Chongqing, 400715, PR China*

## Contents

1. Calculation formula
2. Characterization
  - 2.1 TEM analysis
  - 2.2 Cyclic voltammetry test
3. References

## 1. Calculation formula

The calculation formula for specific capacitance ( $C$ , F g<sup>-1</sup>), energy density ( $E$ , W h kg<sup>-1</sup>) and power density ( $P$ , kW kg<sup>-1</sup>) based on the galvanostatic discharge curves of samples are shown as following:<sup>1-4</sup>

1.1. In three-electrode system, the specific capacitance of an electrode material can be calculated from the equation 1-1:

$$C = I \cdot \Delta t / \Delta V \cdot m \quad (\text{equ. 1-1}),$$

where  $I$ ,  $\Delta t$ ,  $\Delta V$  and  $m$  are discharging current, discharge time, practical potential window and mass of active material on the working electrode, respectively.

1.2. The proper mass ratio ( $R$ ) of the positive and negative active materials in two-electrode system can be confirmed by using equation 1-2:

$$R = \frac{m_+}{m_-} = \frac{C_- \Delta V_-}{C_+ \Delta V_+} \quad (\text{equ. 1-2})$$

where  $m_+$  and  $m_-$  refer to mass,  $C_+$  and  $C_-$  correspond to specific capacitances, while  $\Delta V_+$  and  $\Delta V_-$  are potential windows of the positive and negative electrodes, respectively.

1.3. In two-electrode system, the specific capacitances of a capacitor can be calculated from the equation 1-3:

$$C = I \cdot \Delta t / \Delta V \cdot M \quad (\text{equ. 1-3})$$

where  $I$ ,  $\Delta t$ ,  $\Delta V$  and  $M$  are the discharge current, discharging time, cell voltage and total mass of anode and cathode materials, respectively.

1.4. Energy and power densities can be calculated from the following equations:

$$E = C(\Delta V)^2 / 7.2 \quad (\text{equ. 1-4})$$

$$P = 3600E/\Delta t \quad (\text{equ. 1-5})$$

where  $E$ ,  $C$ ,  $\Delta V$ ,  $P$  and  $\Delta t$  are the specific energy, specific capacitance, potential window, specific power and discharge time, respectively.

## 2. Characterization

### 2.1 TEM analysis

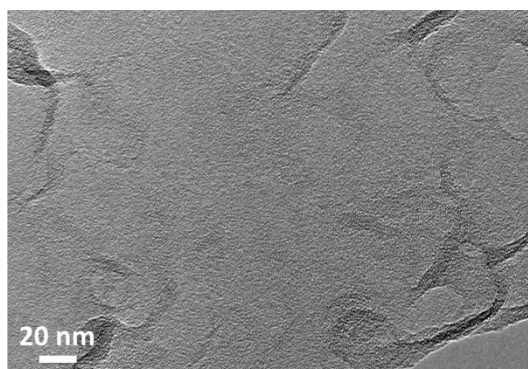

Fig. S1 TEM image of pure SGH.

### 2.2 Cyclic voltammetry test

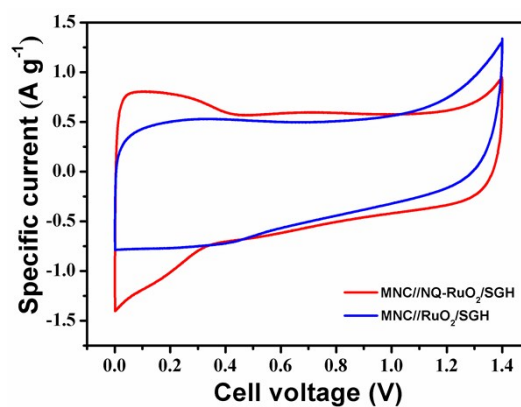

Fig. S2 CV curves of MNC//NQ-RuO<sub>2</sub>/SGH and MNC//RuO<sub>2</sub>/SGH ASC in 1 mol L<sup>-1</sup> H<sub>2</sub>SO<sub>4</sub>

## 3. References

- 1 N. An, Y. F. An, Z. A. Hu, B. S. Guo, Y. Y. Yang and Z. Q. Lei, *J. Mater. Chem. A*, 2015, **3**, 2239-22246.

2 L. Li, Z. A. Hu, Y. Y. Yang, Z. M. Li, N. An and H. Y. Wu, *J. Phys. Chem. C*, 2014, **118**, 22865-22872.

3 H. C. Huang, C. W. Huang, C. T. Hsieh and H. Teng, *J. Mater. Chem. A*, 2014, **2**, 14963–14972.

4 Y. D. Zhang, Z. A. Hu, Y. R. Liang, Y. Y. Yang, Y. F. An, N. An, Z. M. Li and H. Y. Wu, *J. Mater. Chem. A*, 2015, **3**, 15057–15067.
